# Supplementary material
Source: PubMed Central journal article supplement (PMC5810596)
Supplement: NIHMS836268-supplement-Supplemental.pdf [file NIHMS836268-supplement-Supplemental.pdf]

## Supplement Information

XY-profiles and corresponding  $bSSFPX_{asym}$  for  $\Delta_{ws} \approx 1, 3, 9$  ppm and exchange rates from slow to fast exchange regime with  $k_{sw} = 0.5\Delta_{ws}, \Delta_{ws}, 2\Delta_{ws}, 3\Delta_{ws}, 5\Delta_{ws}$  using  $\alpha = 30^\circ$  and  $45^\circ$  which are translated to  $B_{1,field} \approx 0.97$  and  $1.45 \mu T$  assuming  $TR = 2.025$  ms are shown in Figs. S1 and S2, respectively.

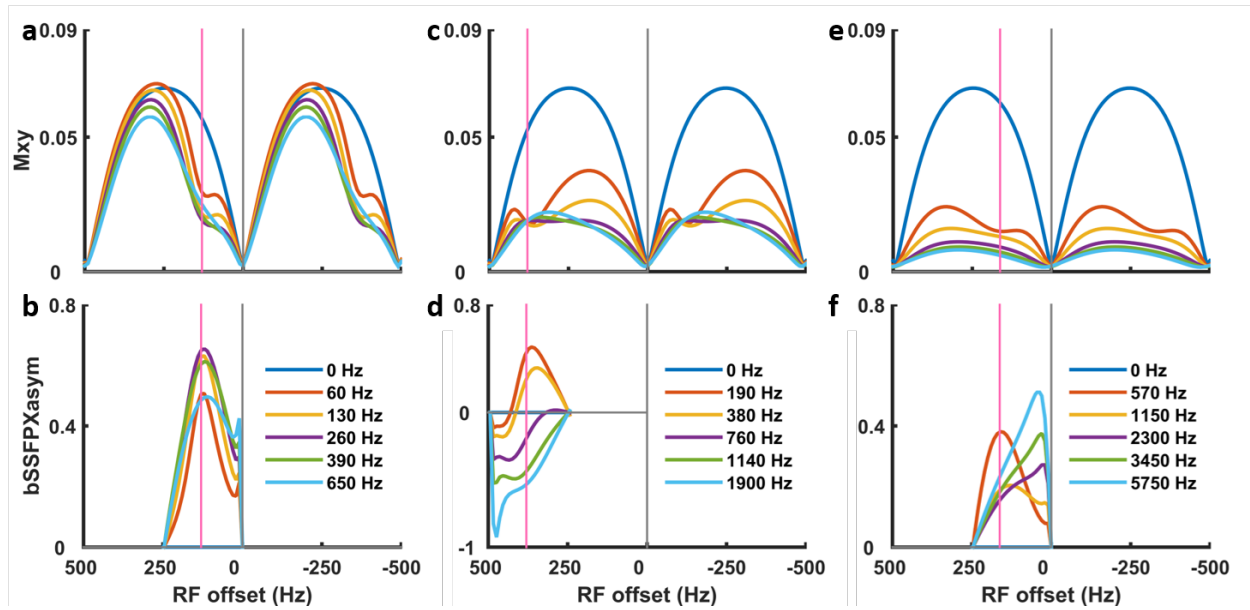

**Figure S1.** Two-pool simulations of bSSFP profiles (a,c,e) and corresponding  $bSSFPX_{asym}$  (b,d,f) for  $\Delta_{ws} \approx 1$  ppm (a,b),  $\Delta_{ws} \approx 3$  ppm (c,d),  $\Delta_{ws} \approx 9$  ppm (e,f), assuming exchange rates from slow to fast exchange regime with  $k_{sw} = 0.5\Delta_{ws}, \Delta_{ws}, 2\Delta_{ws}, 3\Delta_{ws}, 5\Delta_{ws}$  and using  $\alpha = 30^\circ$  ( $B_{1,field} \approx 0.97 \mu T$  with  $TR = 2.025$  ms).

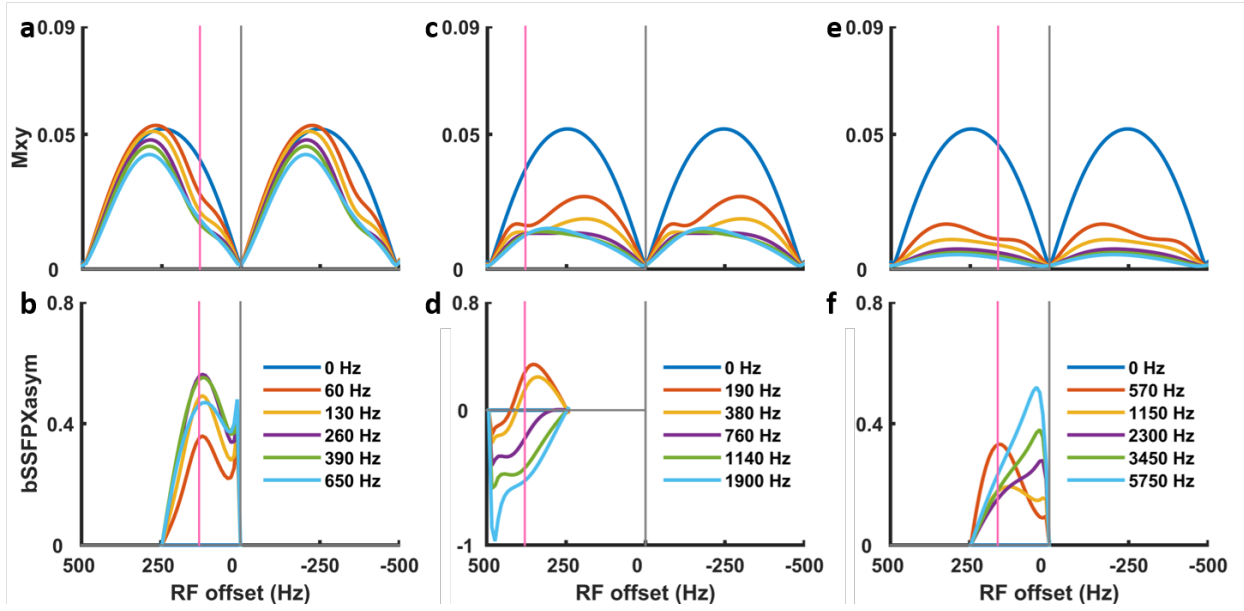

**Figure S2.** Two-pool simulations of bSSFPX profiles (a,c,e) and corresponding  $bSSFPX_{asym}$  (b,d,f) for  $\Delta_{ws} \approx 1$  ppm (a,b),  $\Delta_{ws} \approx 3$  ppm (c,d),  $\Delta_{ws} \approx 9$  ppm (e,f), assuming exchange rates from slow to fast exchange regime with  $k_{sw} = 0.5\Delta_{ws}, \Delta_{ws}, 2\Delta_{ws}, 3\Delta_{ws}, 5\Delta_{ws}$  and using  $\alpha = 45^\circ$  ( $B_{1,field} \approx 1.45 \mu T$  with  $TR = 2.025$  ms).

bSSFPX<sub>asym</sub> and MTR<sub>asym</sub> are compared (Fig. S3) to evaluate the bSSFPX performance for different exchange rates and saturation powers.

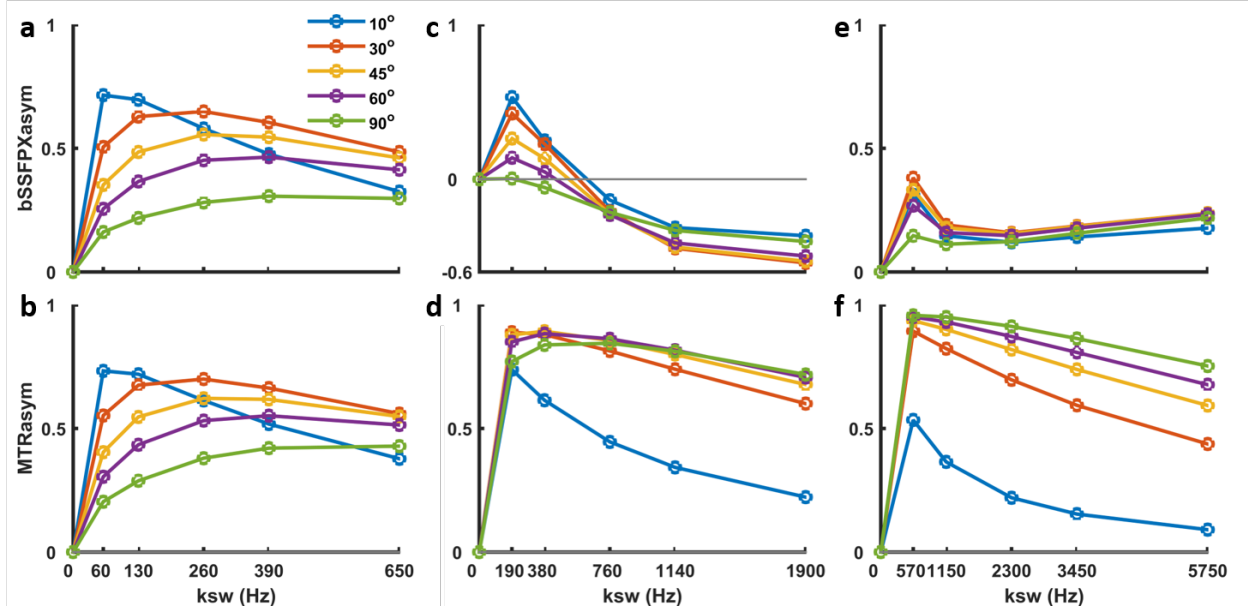

**Figure S3.** Two-pool simulations of bSSFPX<sub>asym</sub> (a-c) and MTR<sub>asym</sub> (d-f) for  $\Delta_{ws} \approx 1$  ppm (a,b),  $\Delta_{ws} \approx 3$  ppm (c,d) and  $\Delta_{ws} \approx 9$  ppm (e,f), assuming exchange rates from slow to fast exchange regime with  $k_{sw} = 0.5\Delta_{ws}, \Delta_{ws}, 2\Delta_{ws}, 3\Delta_{ws}, 5\Delta_{ws}$  and using  $\alpha = 10^\circ, 30^\circ, 45^\circ, 60^\circ, 90^\circ$  ( $B_{1,field} \approx 0.32, 0.97, 1.45, 1.93$  and  $2.90 \mu\text{T}$  with  $\text{TR} = 2.025$  ms).

Two special conditions for the CEST metric  $\text{bSSFPX}_{\text{asym}}$  are shown in Fig. S4.

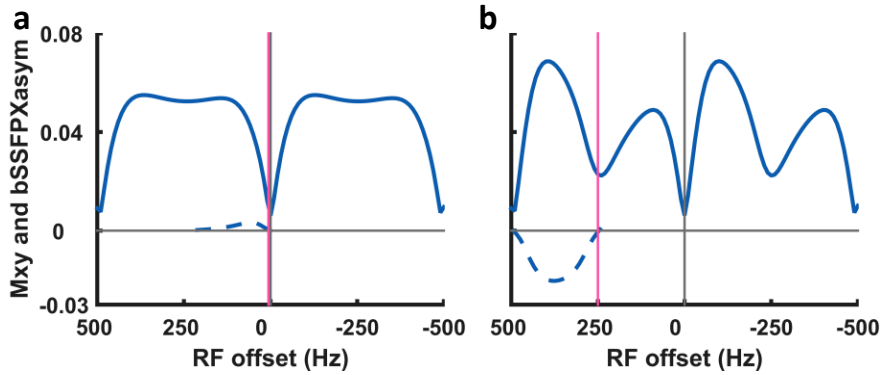

**Figure S4.** Two-pool simulations of bSSFPX profiles (solid line) and corresponding  $\text{bSSFPX}_{\text{asym}}$  normalized to the water pool size (dotted line) for  $\Delta_{ws} = 250$  Hz (a) and 500 Hz (b). For  $\text{TR} = 2.025$  ms,  $\Delta_{ws} = 250$  Hz is about one half cycle and 500 Hz is about one full cycle. In the simulation,  $k_{sw} = 250$  Hz and  $\alpha = 10^\circ$ , other simulation parameters are the same as described in the Section 3.1.

The  $\text{bSSFPX}_{\text{asym}}$  and  $\text{MTR}_{\text{asym}}$  are compared (Fig. S5) to further characterize the performance of bSSFPX for different exchange rates and saturation powers.

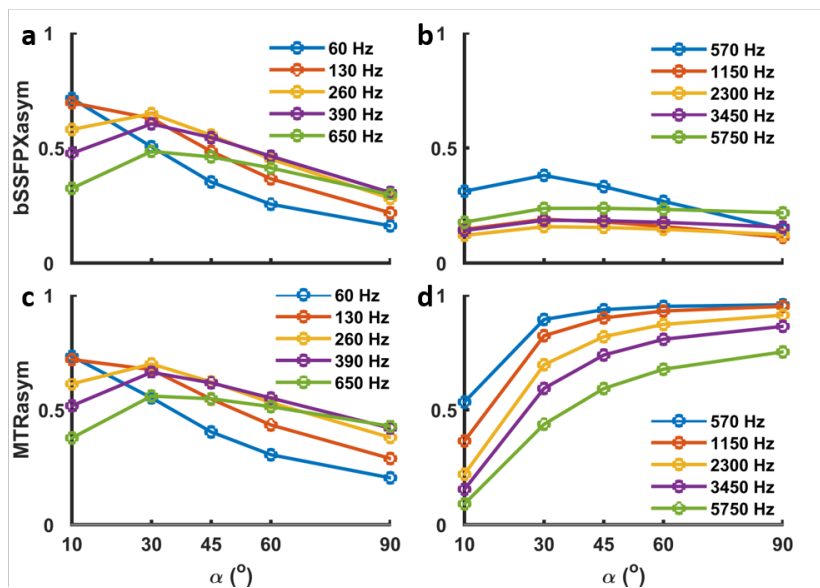

**Figure S5.** Two-pool simulations of  $\text{bSSFPX}_{\text{asym}}$  (a,b) and  $\text{MTR}_{\text{asym}}$  (c,d) for  $\Delta_{\text{ws}} \approx 1$  (a,c) and  $\Delta_{\text{ws}} \approx 9$  ppm (b,d), assuming exchange rates from slow to fast exchange regime with  $k_{\text{sw}} = 0.5\Delta_{\text{ws}}, \Delta_{\text{ws}}, 2\Delta_{\text{ws}}, 3\Delta_{\text{ws}}, 5\Delta_{\text{ws}}$  and using  $\alpha = 10^\circ, 30^\circ, 45^\circ, 60^\circ, 90^\circ$  ( $B_{1,\text{field}} \approx 0.32, 0.97, 1.45, 1.93$  and  $2.90 \mu\text{T}$  with  $\text{TR} = 2.025$  ms).

Standard Z-spectra of phantoms I and II (Fig.S6) were acquired using sequence and parameters described in Methods.

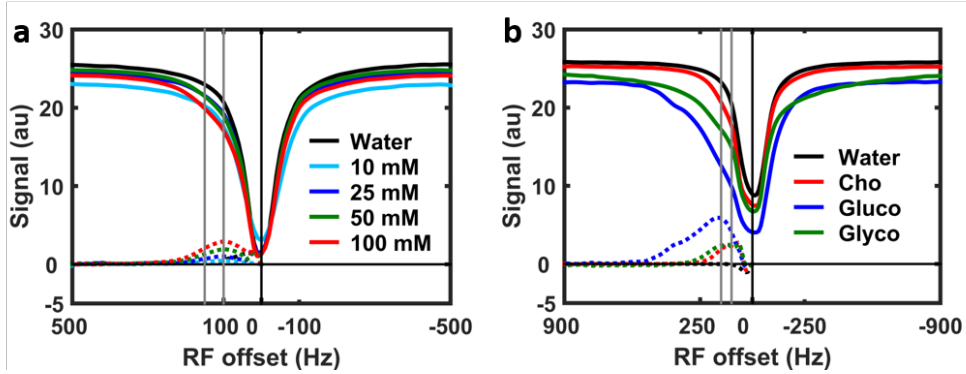

**Figure S6.** Z-spectra and non-normalized  $MTR_{\text{asym}}$  for (a) different concentrations of choline solutions: 0 (black), 10 mM (light blue), 25 mM (indigo), 50 mM (green) and 100 mM (red) and (b) different molecules: water (black), choline (Cho, red), glucose (Gluko, blue) and glycogen (Glyco, green). The solid and dotted lines correspond to profiles and asymmetry, respectively. A set of two vertical lines on the downfield side indicates the frequency range 100-150 Hz in which the  $MTR_{\text{asym}}$  is averaged as shown in Figs. 9c and 10c.
